# Supplementary material for: Diverse effector and regulatory functions of fibro/adipogenic progenitors during skeletal muscle fibrosis in muscular dystrophy
Source: PubMed Central journal article supplement — iScience. 2022 Dec 8;26(1):105775. doi: 10.1016/j.isci.2022.105775 (PMC9804115; doi:10.1016/j.isci.2022.105775), 2022-12-08
Supplement: mmc1.pdf [file mmc1.pdf]

iScience, Volume 26

## **Supplemental information**

### **Diverse effector and regulatory functions of fibro/adipogenic progenitors during skeletal muscle fibrosis in muscular dystrophy**

**Xingyu Wang, Jianming Chen, Sachiko T. Homma, Yinhang Wang, Gregory R. Smith, Frederique Ruf-Zamojski, Stuart C. Sealfon, and Lan Zhou**

**Figure S1. Persistent inflammation, progressive fibrosis and accumulation of FAPs in *mdx*<sup>5cv</sup> diaphragm, related to Figure 1**

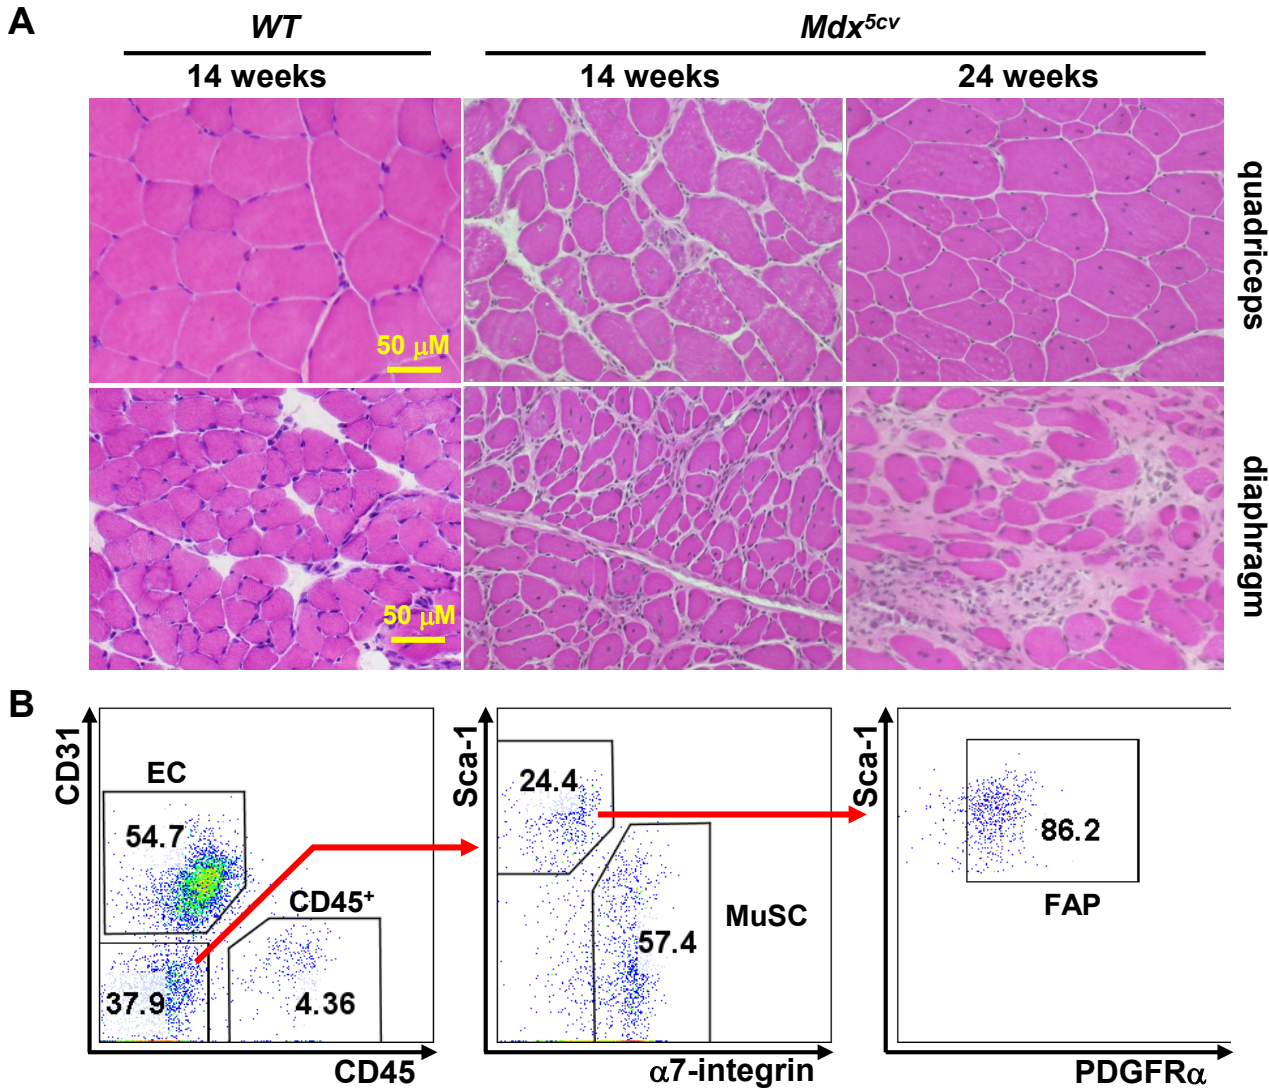

**A.** HE staining of cryosections of quadriceps and diaphragm muscles from wild-type (*WT*) and *mdx*<sup>5cv</sup> mice at age 14 weeks and 24 weeks showing diaphragm, but not quadriceps, of *mdx*<sup>5cv</sup> mice undergoing progressive fibrosis from 14 weeks to 24 weeks. Bar = 50  $\mu$ M **B.** Gating strategy of FACS analysis to identify intramuscular endothelial cells (EC), CD45<sup>+</sup> cells, fibro/adipogenic progenitors (FAP), and muscle satellite cells (MuSC). Representative results shown here are from the analysis of single-cell suspension prepared from quadriceps of 14 weeks old *WT* mice.

**Figure S2. Marker genes of different cell types in each muscle, related to Figure 1.**

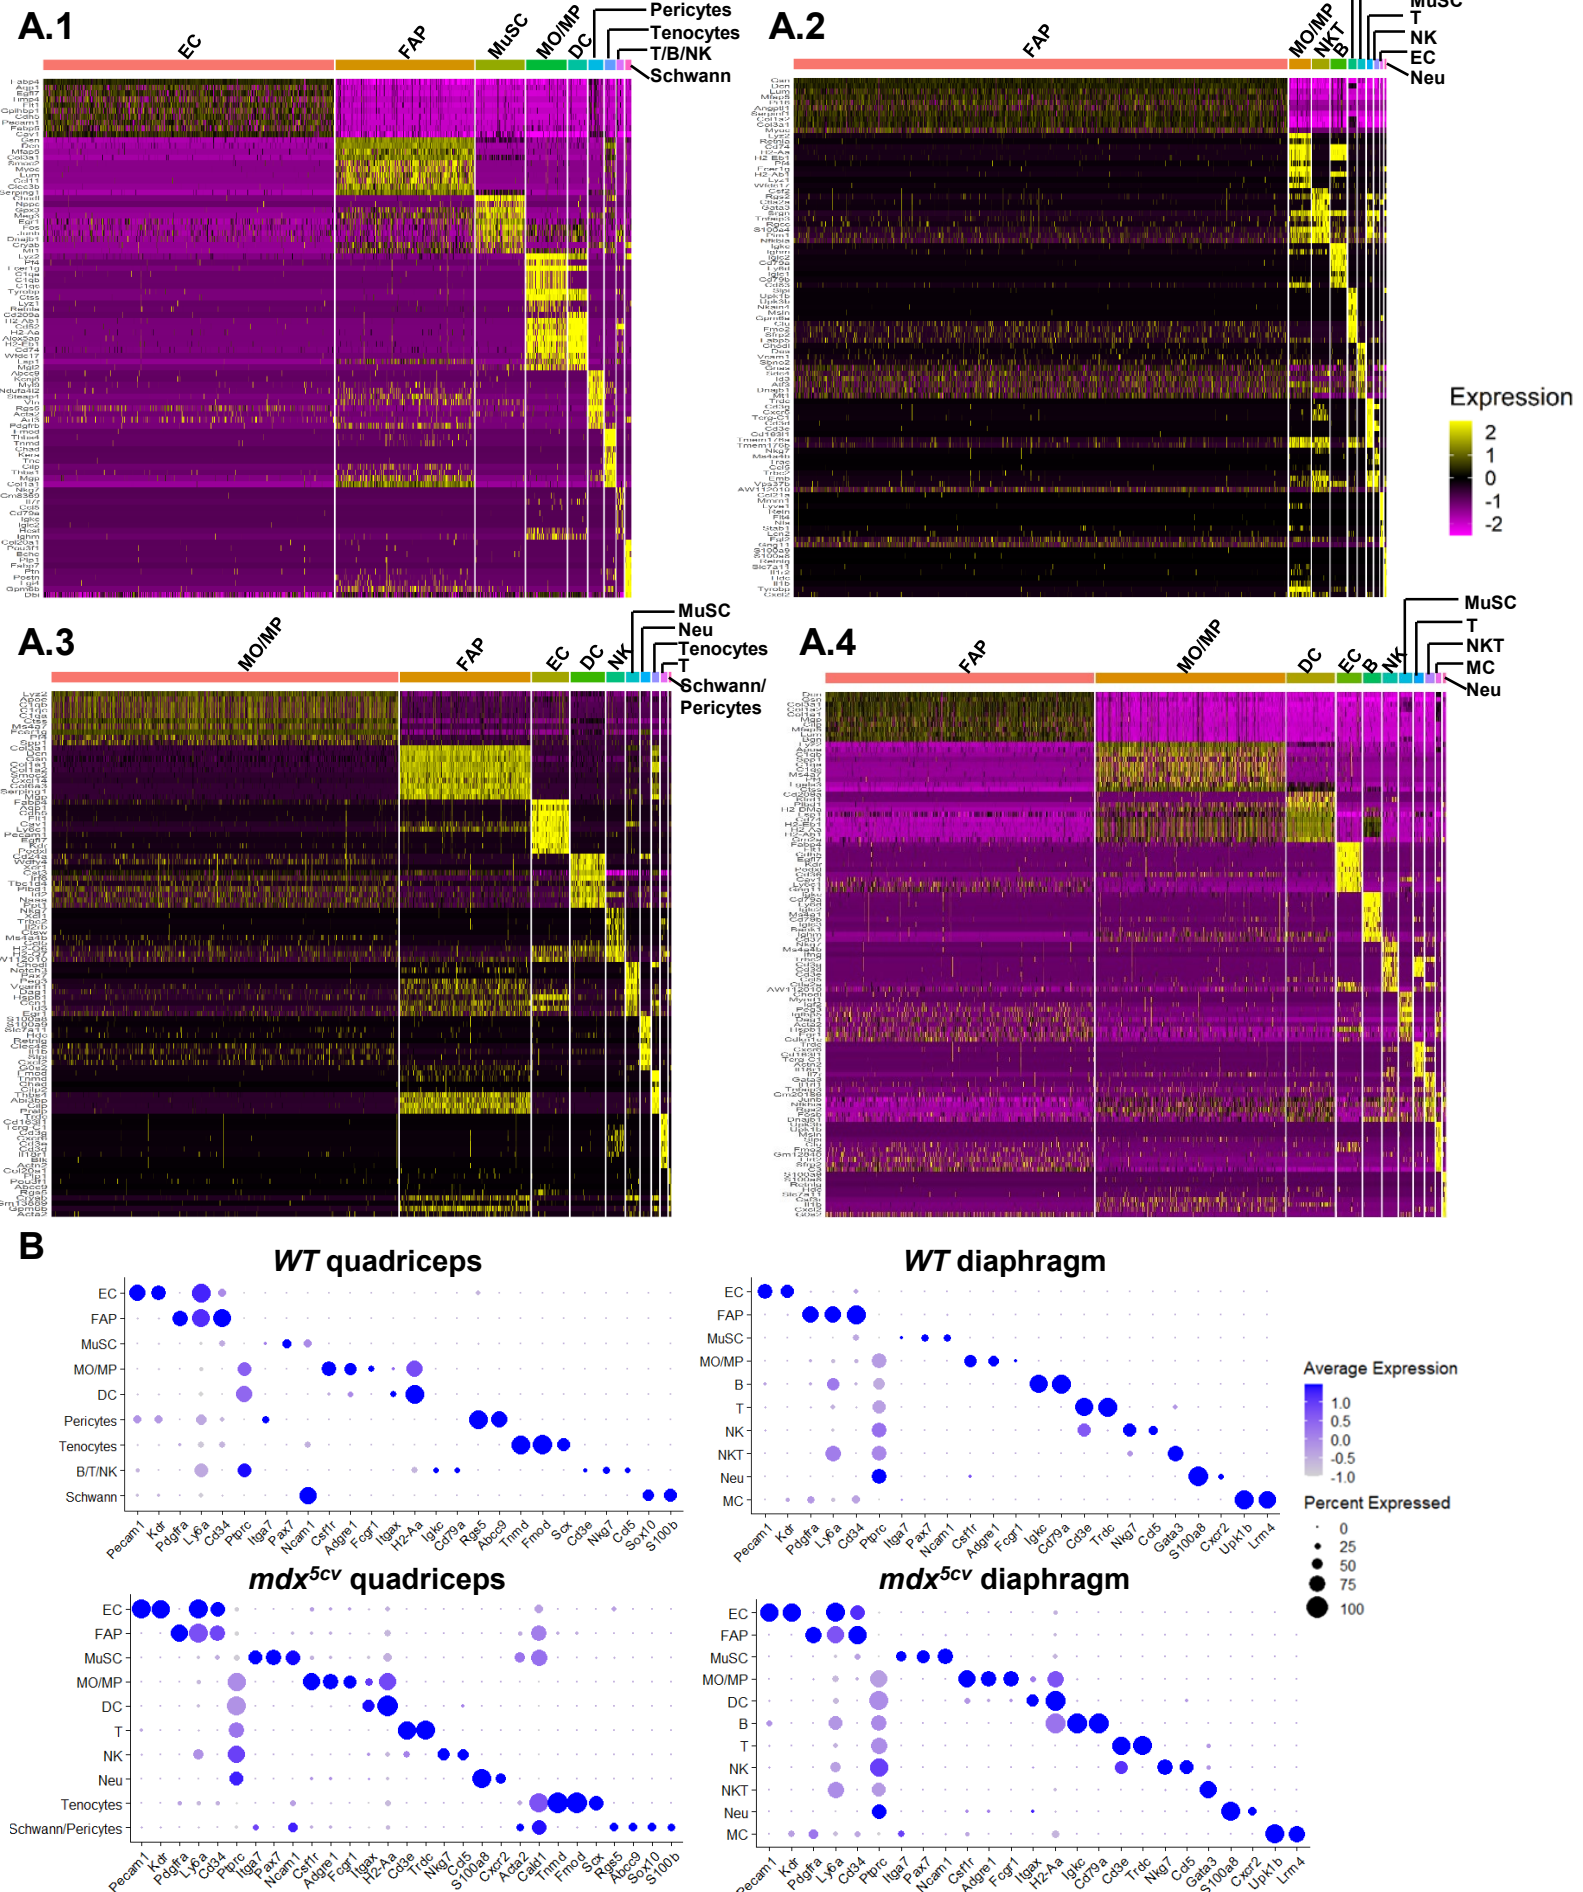

**A.** Heatmap depicting top 10 differentially expressed genes (DEGs) of individual cell types in *WT* quadriceps (**A.1**), *WT* diaphragm (**A.2**), *mdx*<sup>5cv</sup> quadriceps (**A.3**), and *mdx*<sup>5cv</sup> diaphragm (**A.4**). The names of the top 10 DEGs of each cell type are listed in **Table S2**. **B:** Dot plot showing marker genes of different cell types in each muscle.

**Figure S3. Expression of collagens and fibronectin by different cell types, related to Figures 2A and 4D.**

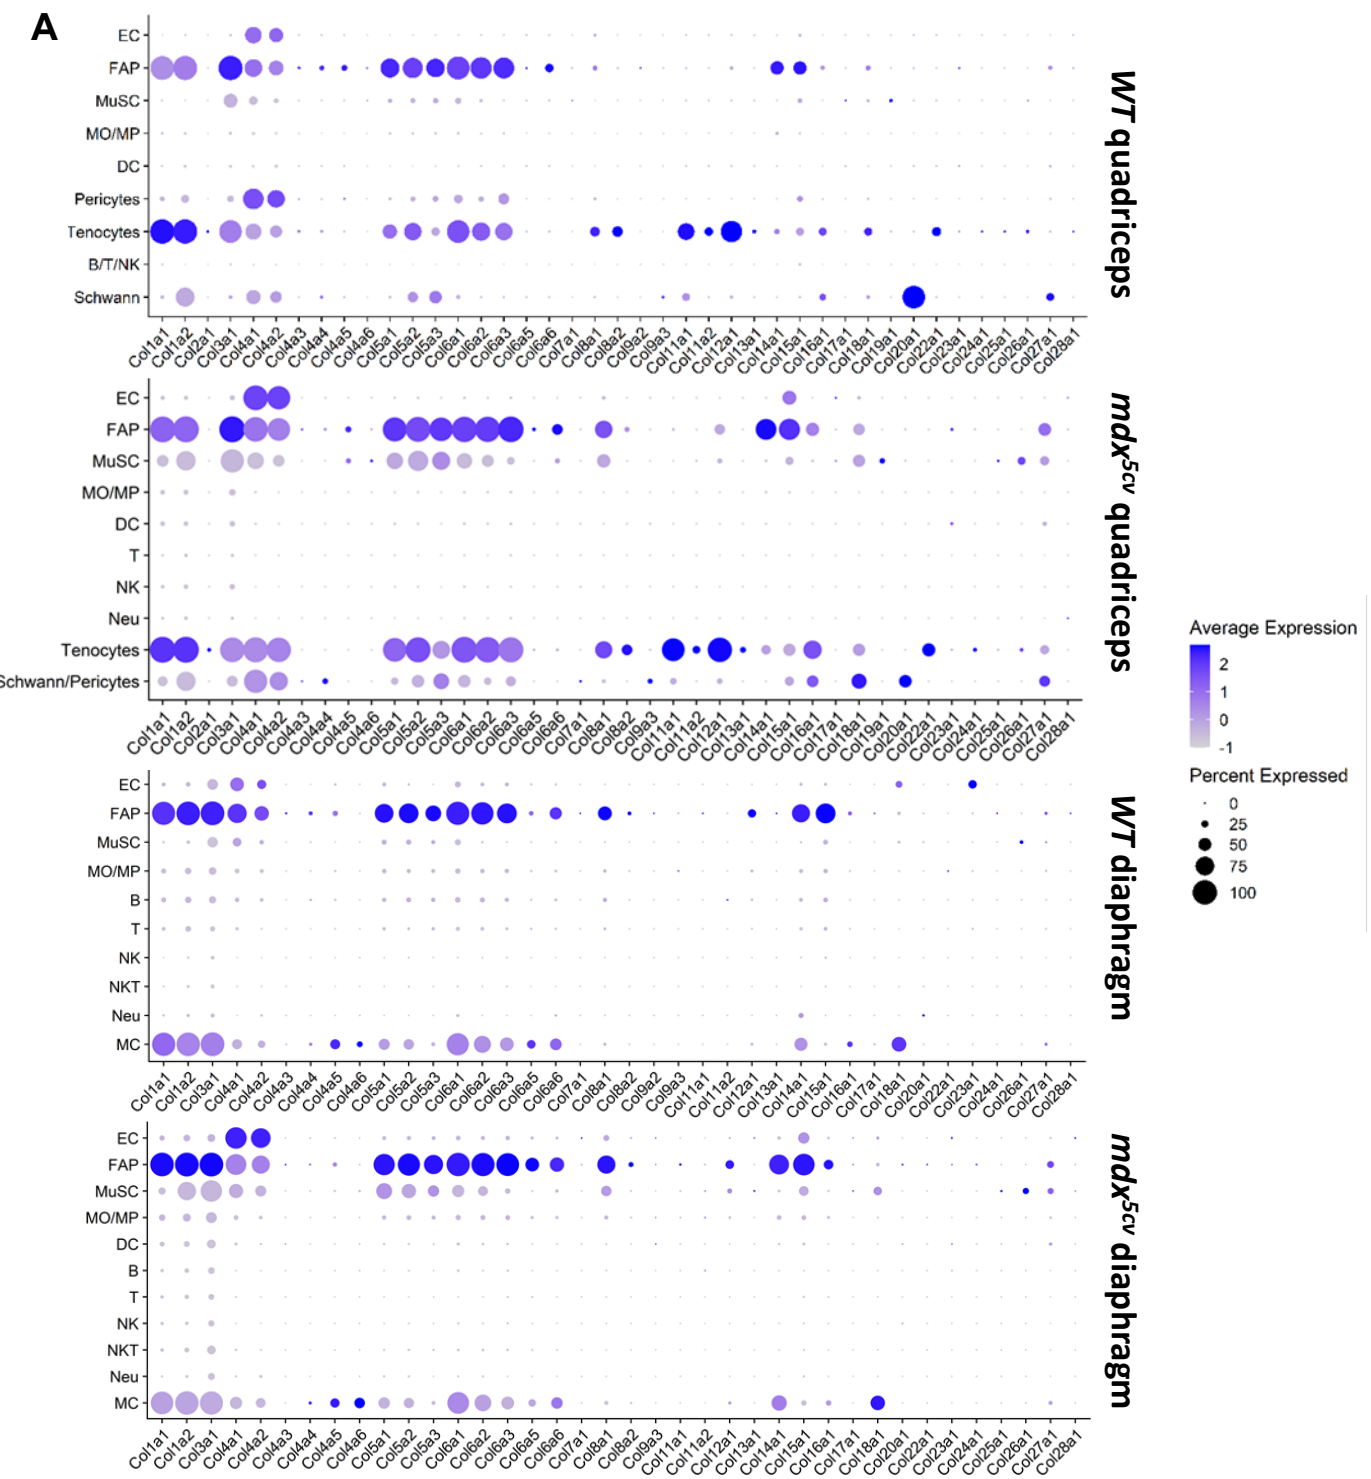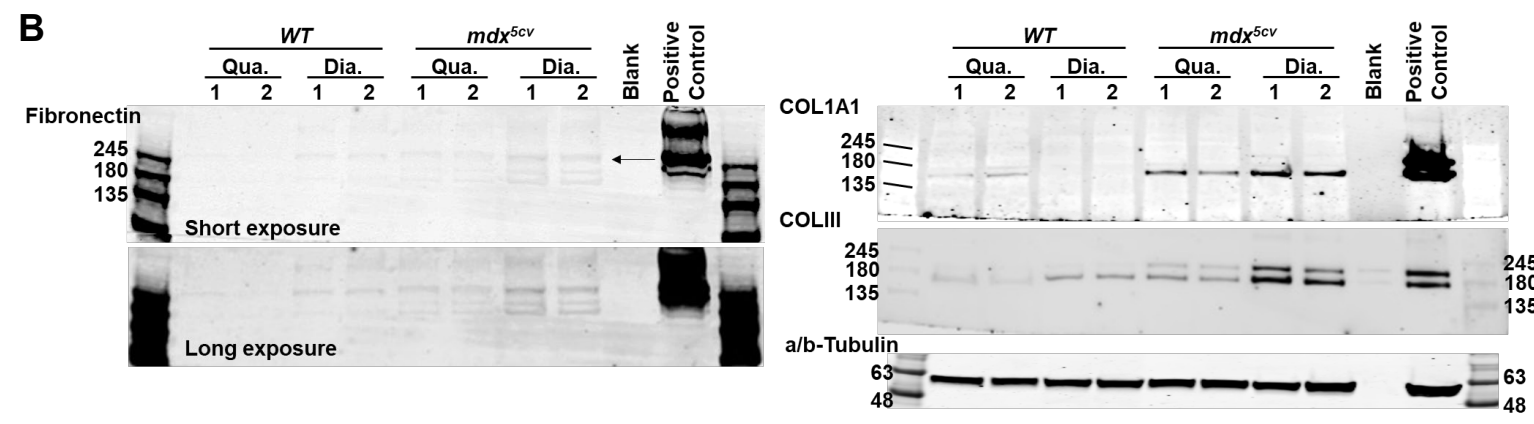

**A.** Dot plot showing expression of detectable collagen genes by different cell types in each muscle. **B.** Original pictures of Western blot showing expression of COL1A1, COL3A1, and fibronectin by quadriceps and diaphragm of WT and *mdx*<sup>5cv</sup> mice.

**Figure S4. Expression of genes encoding proteoglycan and synthesizing enzymes of glycosaminoglycan by different cell types, related to Figure 2.**

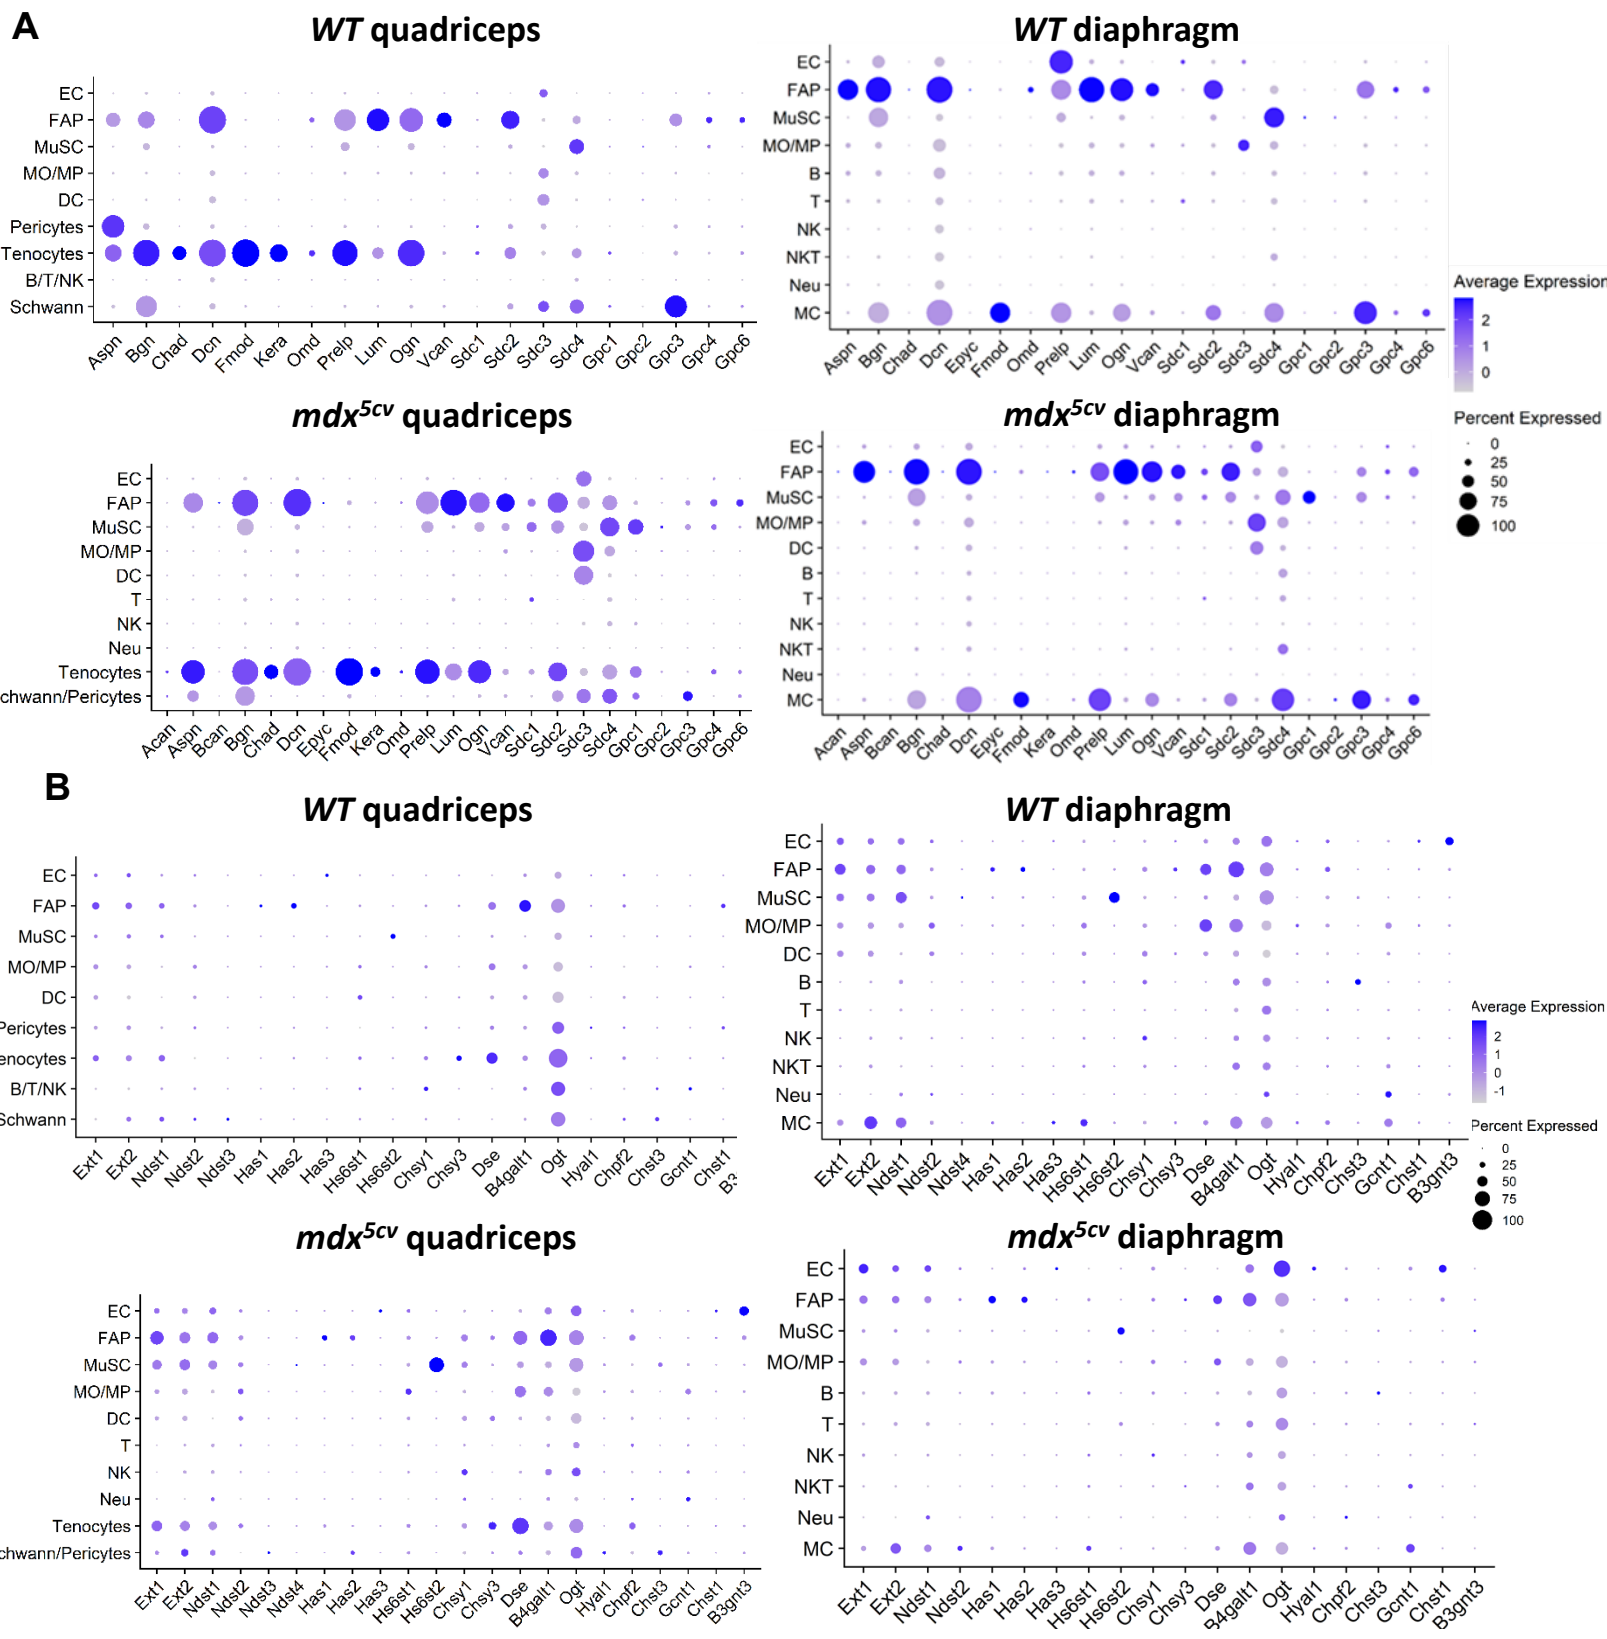

Dot plot showing expression of detectable proteoglycan genes (A) and synthesizing enzymes of glycosaminoglycan (B) genes by different cell types in each muscle.

**Figure S5. Expression of ECM regulatory genes by different cell types in each muscle, related to Figure 3.**

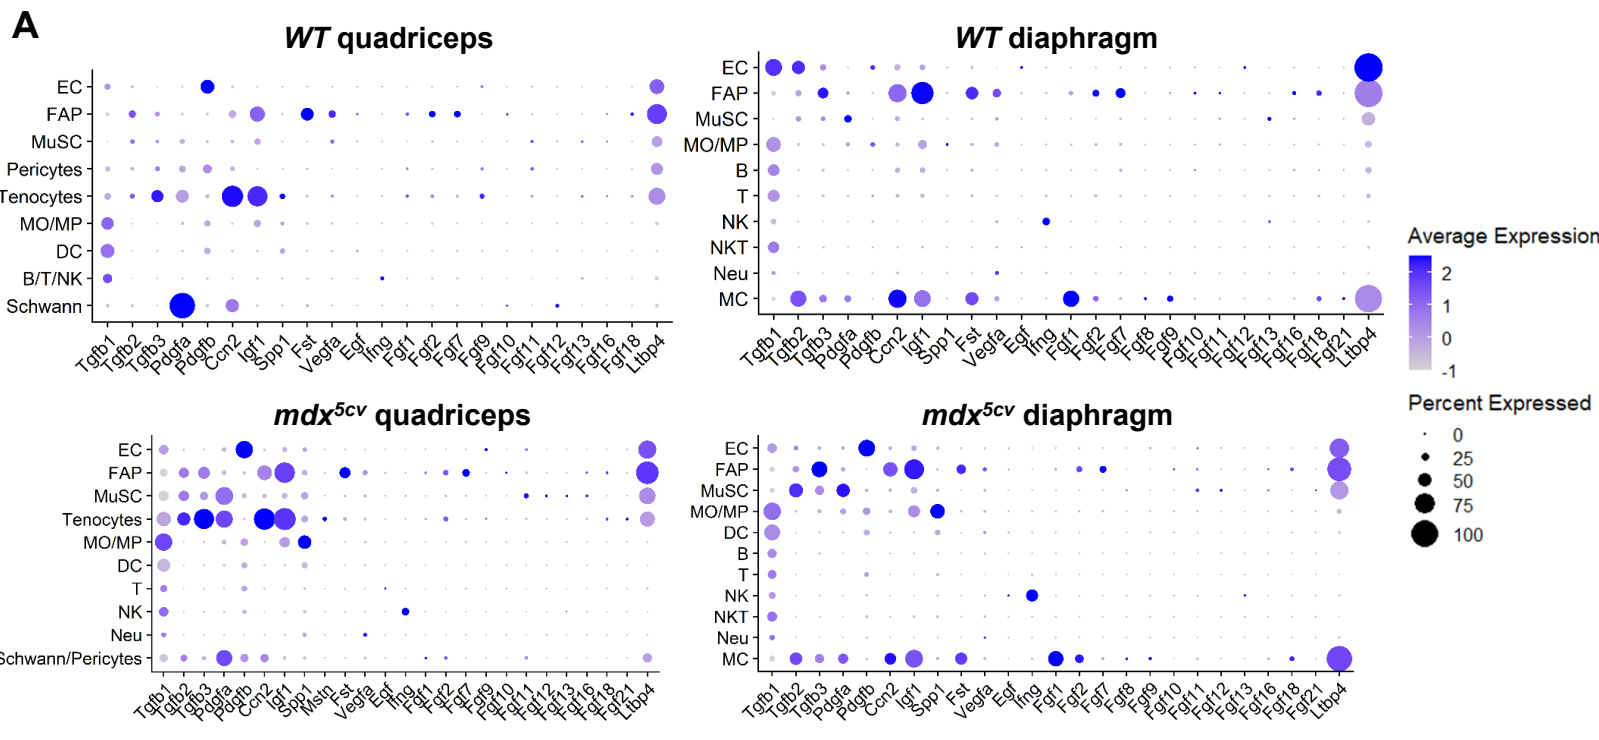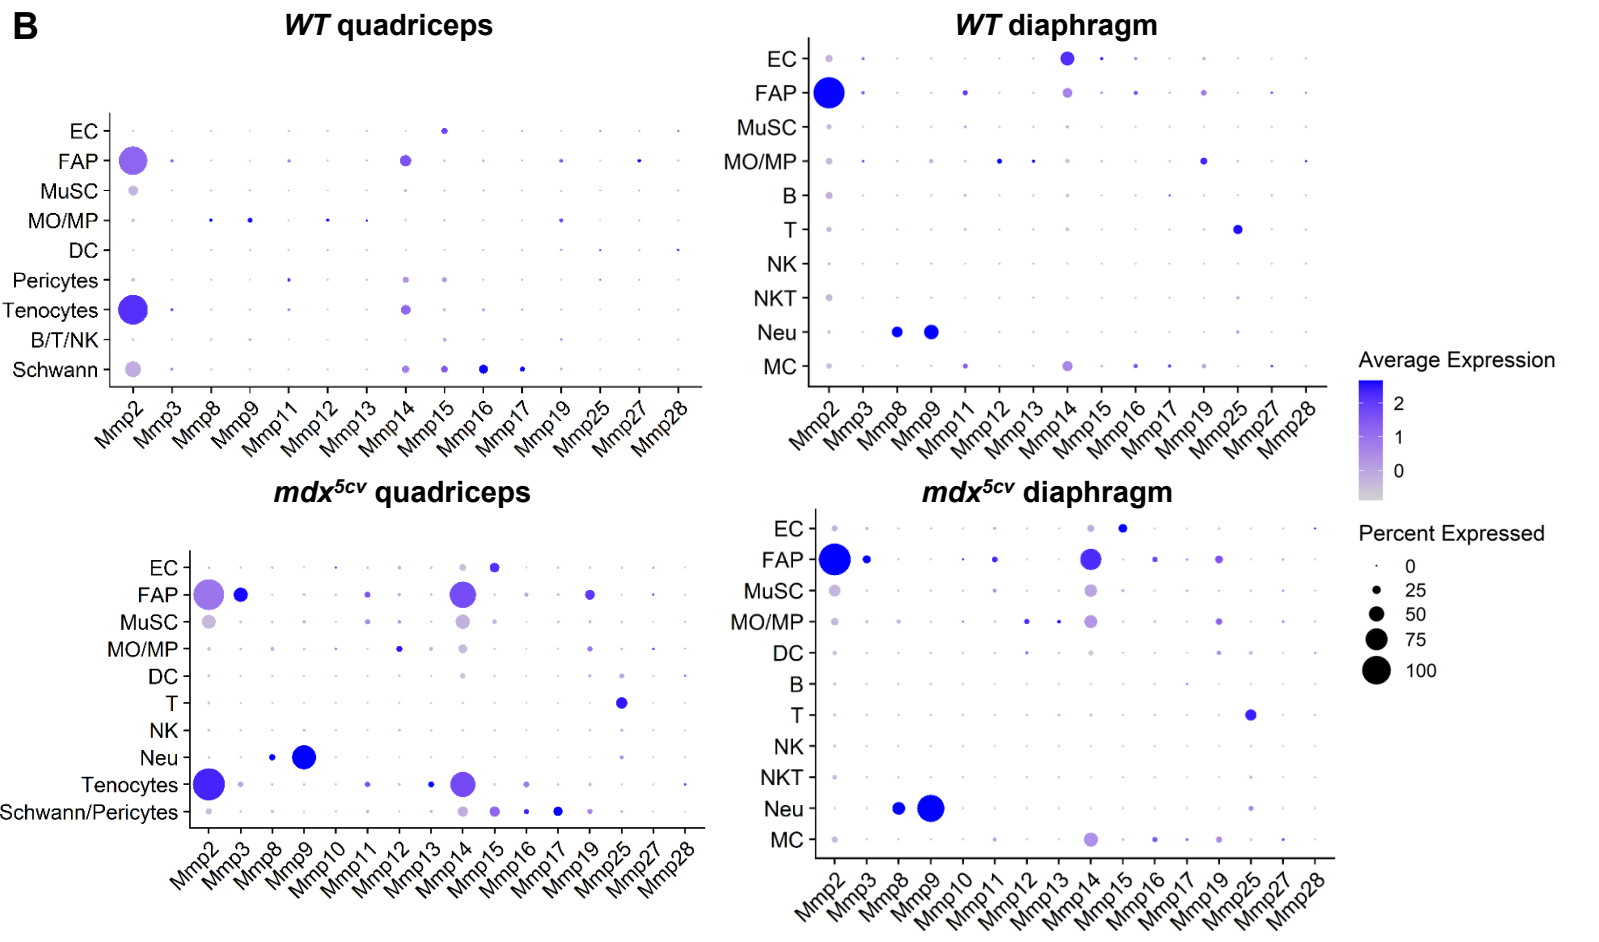

Dot plot showing expression of detectable ECM regulatory genes by different cell types in each muscle. **A.** Fibrogenic factor genes. **B.** MMP genes.

**Figure S6. FAPs consist of functionally diverse clusters which are different among quadriceps and diaphragm in *WT* and *mdx*<sup>5cv</sup> mice, related to Figure 5.**

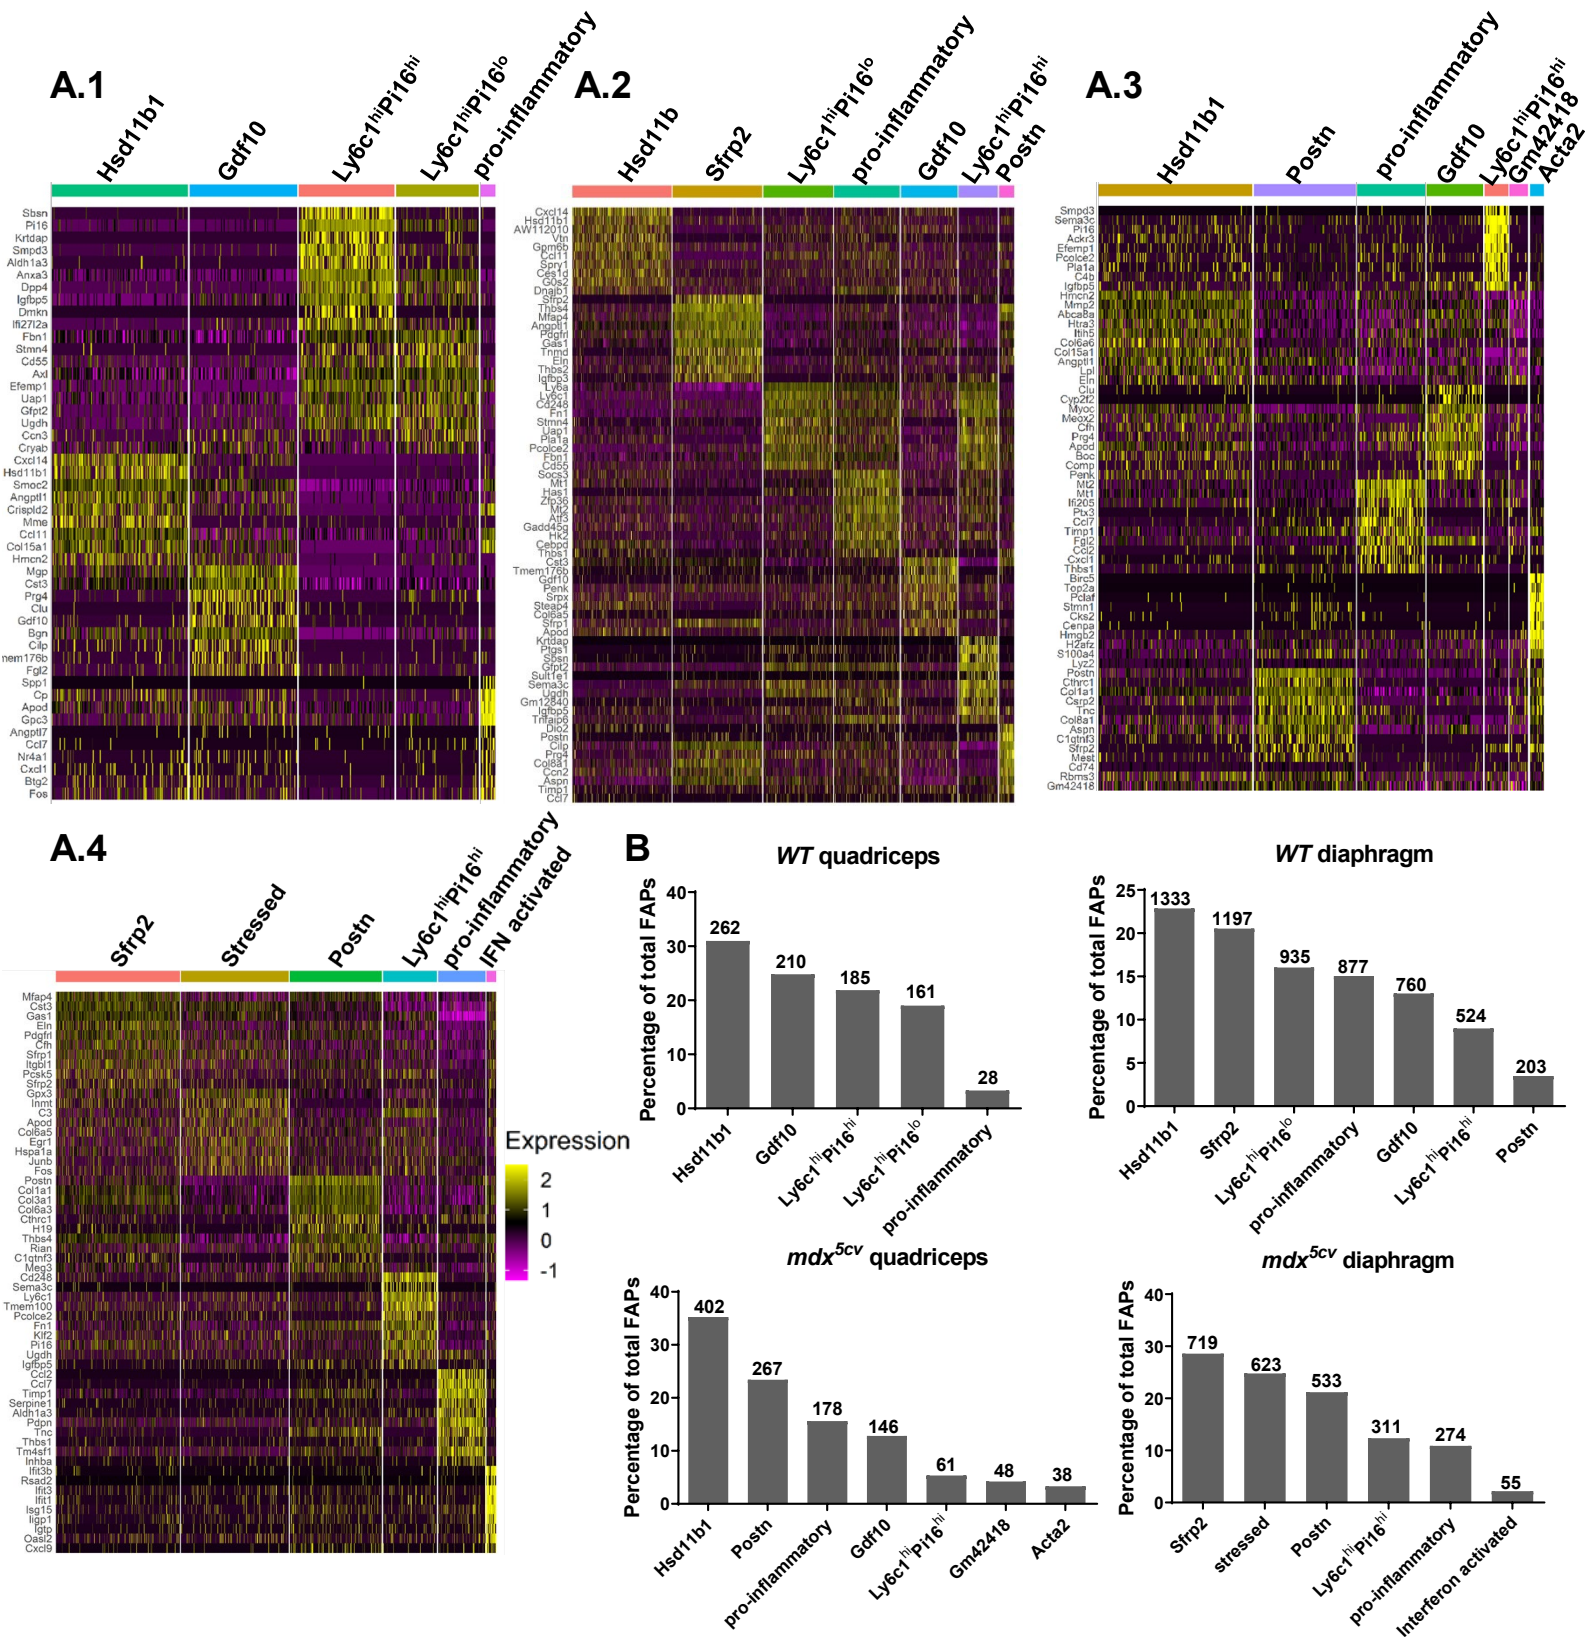

**A.** Heatmap depicting top 10 differentially expressed genes in individual FAP clusters in *WT* quadriceps (A.1), *WT* diaphragm (A.2), *mdx*<sup>5cv</sup> quadriceps (A.3), and *mdx*<sup>5cv</sup> diaphragm (A.4). These genes are also listed in Tables S3-6. **B.** Bar graph showing percentage of individual FAP clusters to total FAPs in each muscle sample. The number of cells identified by scRNAseq analysis for each FAP cluster is shown on top of each bar.

**Figure S7. Comparison of *mdx*<sup>5cv</sup> quadriceps and diaphragm FAPs at 14 weeks of age, related to Figure 1 and Discussion**

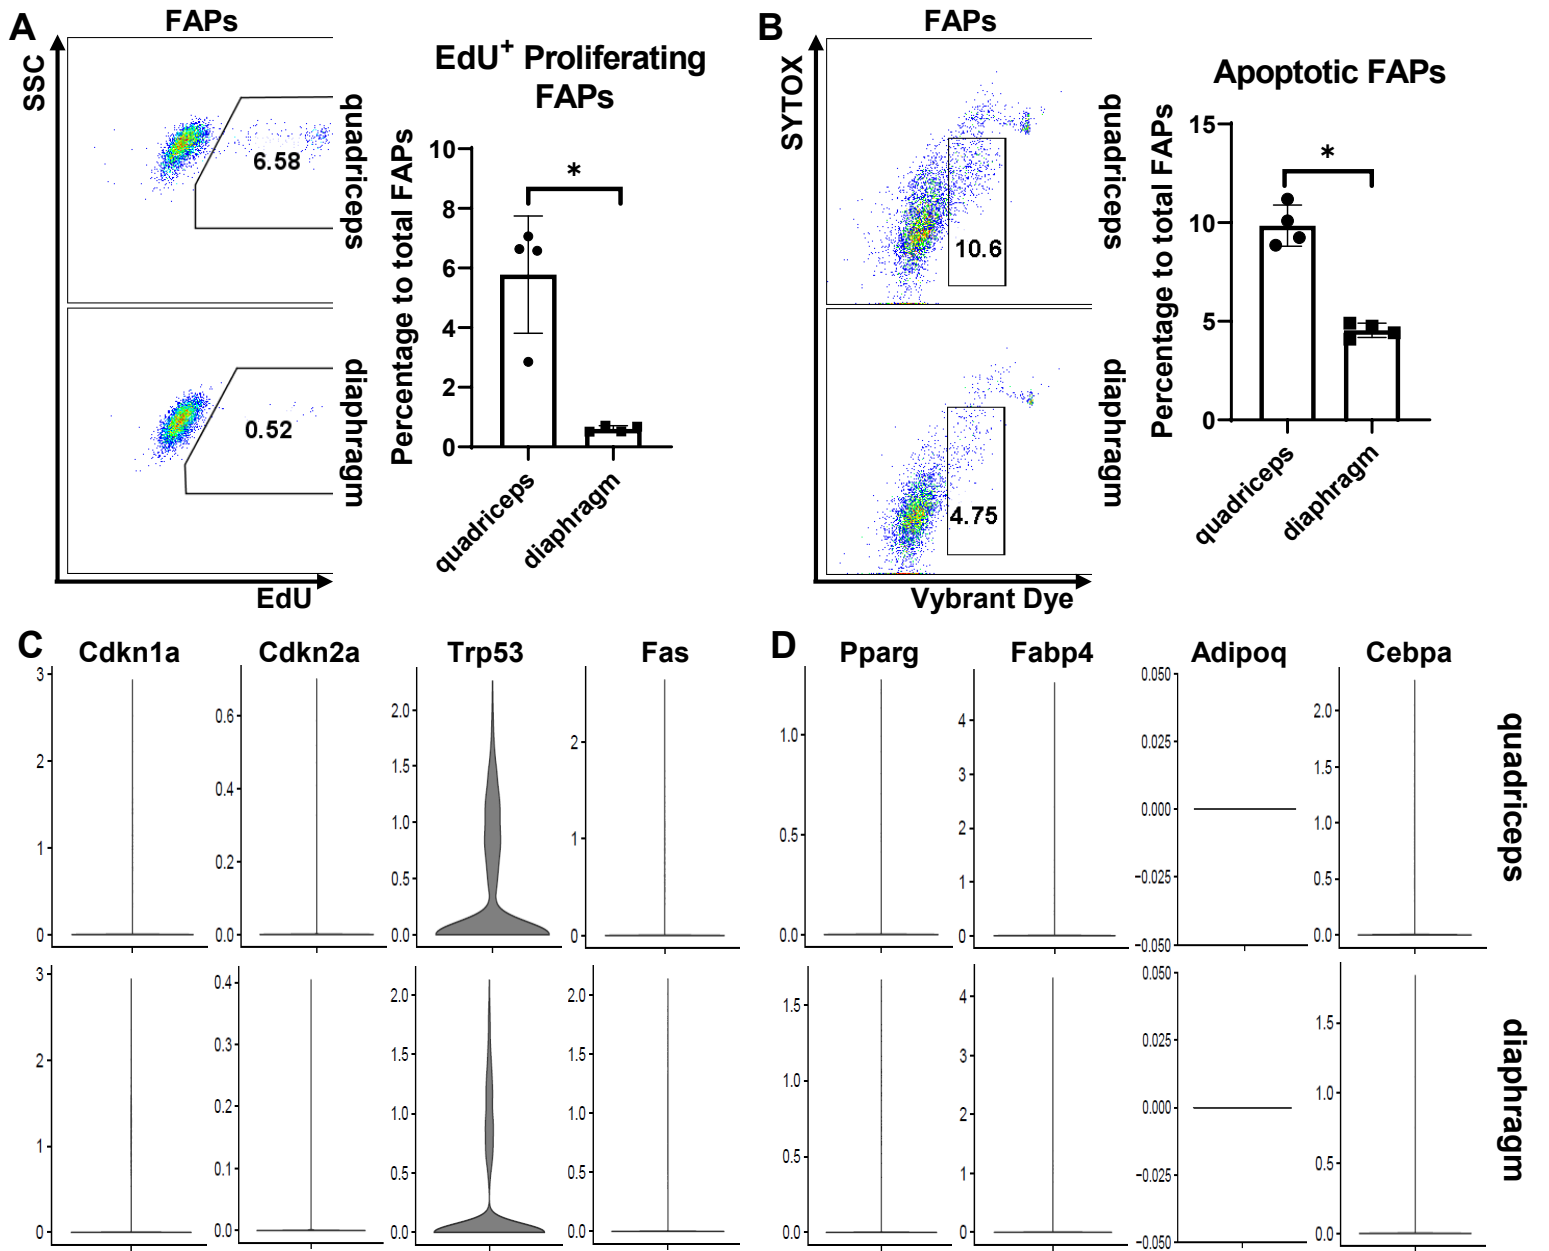

**A.** Dot plot (left) showing FACS analysis of EdU<sup>+</sup> proliferating FAPs. Bar graph (right) showing percentage of EdU<sup>+</sup> proliferating FAPs. **B.** Dot plot (left) showing FACS analysis of apoptotic FAPs. Bar graph (right) showing percentage of apoptotic FAPs. Bar graphs of **A & B**: data are presented as mean ± SEM. Asterisks indicate significant differences (\**p* < 0.05, determined by Mann-Whitney test). **C & D.** Violin plots showing expression of the genes related to senescence (**C**) and adipogenesis (**D**).



**Table S1. scRNAseq Quality Control, related to Figure 1.**

| <b>Sample ID</b>                                    | <b>WT_quadriceps</b> | <b>WT_diaphragm</b> | <b><i>mdx</i><sup>5cv</sup>_quadriceps</b> | <b><i>mdx</i><sup>5cv</sup>_diaphragm</b> |
|-----------------------------------------------------|----------------------|---------------------|--------------------------------------------|-------------------------------------------|
| <b>Estimated Number of Cells</b>                    | 6,545                | 8,485               | 9,897                                      | 8,286                                     |
| <b>Mean Reads per Cell</b>                          | 43,703               | 33,343              | 30,252                                     | 34,137                                    |
| <b>Median Genes per Cell</b>                        | 962                  | 1,746               | 1,800                                      | 1,761                                     |
| <b>Median UMI Counts per Cell</b>                   | 1,780                | 4,128               | 4,603                                      | 4,505                                     |
| <b>Reads Mapped Confidently to Intronic Regions</b> | 22.3%                | 17.5%               | 21.9%                                      | 20.7%                                     |
| <b>Reads Mapped Confidently to Exonic Regions</b>   | 69.9%                | 74.4%               | 69.3%                                      | 71.1%                                     |
| <b>Reads Mapped Confidently to Transcriptome</b>    | 68.3%                | 72.7%               | 67.8%                                      | 69.6%                                     |
| <b>Q30 Bases in RNA Read</b>                        | 94.3%                | 93.5%               | 94.4%                                      | 94.5%                                     |
| <b>Fraction Reads in Cells</b>                      | 85.5%                | 93.1%               | 94.3%                                      | 94.1%                                     |

**Table S2. Top 10 differentially expressed genes by different intramuscular cell types of quadriceps and diaphragm muscles in *WT* and *mdx*<sup>5cv</sup> mice, related to Figures 1 and S2.**

| Sample                                     | Cell type                                                            | Top 10 DEGs                                                               |
|--------------------------------------------|----------------------------------------------------------------------|---------------------------------------------------------------------------|
| <b>WT quadriceps</b>                       | EC                                                                   | Fabp4, Aqp1, Egfl7, Timp4, Flt1, Gpihbp1, Cdh5, Pecam1, Fabp5, Cav1       |
|                                            | FAP                                                                  | Gsn, Dcn, Mfap5, Col3a1, Smoc2, Myoc, Lum, Ccl11, Clec3b, Serping1        |
|                                            | MuSC                                                                 | Chodl, Nppc, Gpx3, Meg3, Egr1, Fos, Junb, Dnajb1, Cryab, Mt1              |
|                                            | MO/MP                                                                | Lyz2, Pf4, Fcer1g, C1qa, C1qb, C1qc, Tyrobp, Ctss, Lyz1, Retnla           |
|                                            | DC                                                                   | Cd209, H2-Ab1, Cd52, H2-Aa, Alox5ap, H2-Eb1, Cd74, Wfdc17, Lsp1, Mgl2     |
|                                            | Pericytes                                                            | Abcc9, Kcnj8, Myl9, Ndufa4l2, Steap4, Vtn, Rgs5, Acta2, Art3, Pdgfrb      |
|                                            | Tenocytes                                                            | Fmod, Thbs4, Tnmd, Chad, Kera, Tnc, Clip, Thbs1, Mgp, Col1a1              |
|                                            | B/T/NK                                                               | Nkg7, Gm8369, Il7r, Ccl5, Cd79a, Igkc, Iglc2, Hcst, Ighm, Il2rg           |
|                                            | Schwann                                                              | Col20a1, Pou3f1, Bche, Plp1, Fabp7, Ptn, Postn, Lgi4, Gpm6b, Dbi          |
| <b>WT diaphragm</b>                        | FAP                                                                  | Gsn, Dcn, Lum, Mfap5, Pi16, Angptl1, Serpinf1, Col1a2, Col3a1, Myoc       |
|                                            | MO/MP                                                                | Lyz2, Retnla, Cd74, H2-Aa, H2-Eb1, Pf4, Fcer1g, H2-Ab1, Lyz1, Wfdc17,     |
|                                            | NKT                                                                  | Csf2, Rgs2, Ctla2a, Gata3, Srgn, Tnfaip3, Rgcc, S100a4, Pim1, Nfkbia      |
|                                            | B                                                                    | Igkc, Ighm, Iglc2, Cd79a, Cd74, Ly6d, Iglc1, H2-Aa, Cd79b, Cd83           |
|                                            | MC                                                                   | Slpi, Upk1b, Upk3b, Nkain4, Msln, Gpm6a, Clu, Fmo2, Sfrp2, Fabp5          |
|                                            | MuSC                                                                 | Chodl, Des, Vcam1, Sbn2, Gnas, Sdc4, Id3, Atf3, Dnajb1, Mt1               |
|                                            | T                                                                    | Trdc, Cd3g, Cxcr6, Tcrg-C1, Cd3d, Cd3e, Cd163l1, Tmem176a, Tmem176b, Il7r |
|                                            | NK                                                                   | Nkg7, Ms4a4b, Trac, Ccl5, Trbc2, Emb, Vps37b, Aw112010, Cd3d, Ctla2a      |
|                                            | EC                                                                   | Ccl21a, Mmrn1, Lyve1, Reln, Flt4, Nts, Stab1, Lcn2, Fgl2, Gng11           |
|                                            | Neu                                                                  | S100a9, S100a8, Retnlg, Slc7a11, Il1r2, Hdc, Il1b, Tyrobp, Cxcl2, Slpi    |
| <b><i>mdx</i><sup>5cv</sup> quadriceps</b> | MO/MP                                                                | Lyz2, Apoe, C1qb, C1qc, C1qa, Ctss, Ms4a1, Fcer1g, Pf4, Spp1              |
|                                            | FAP                                                                  | Col3a1, Dcn, Gsn, Col1a1, Col1a2, Smoc2, Cxcl14, Col6a3, Serping1, Mgp    |
|                                            | EC                                                                   | Fabp4, Aqp1, Cdh5, Flt1, Cav1, Ly6c1, Pecam1, Egfl7, Kdr, Podxl           |
|                                            | DC                                                                   | Cd24a, Wdfy4, Xcr1, Cst3, Irf8, Tbc1d4, Plbd1, Id2, Naaa, Ppt1            |
|                                            | NK                                                                   | Nkg7, Xcl1, Trbc2, Il2rb, Ctsw, Ms4a4b, Ccl5, H2-Q6, H2-Q7, Aw112010      |
|                                            | MuSC                                                                 | Chodl, Notch3, Pax7, Peg3, Vcam1, Dag1, Hspb1, Ccn1, Id3, Egr1            |
|                                            | Neu                                                                  | S100a9, S100a8, Slc7a11, Hdc, Retnlg, Clec4e, Il1b, Slpi, Cxcl2, G0s2     |
|                                            | Tenocytes                                                            | Fmod, Tnmd, Chad, Cilp2, Thbs4, Abi3bp, Cilp, Prelp, Mgp, Chodl           |
|                                            | T                                                                    | Trdc, Cd163l1, Tcrg-C1, Cd3g, Cxcr6, Cd3e, Cd3d, Il18r1, Blk, Actn2       |
|                                            | Schwann/Pericytes                                                    | Col20a1, Plp1, Pou3f1, Abcc9, Rgs5, Cryab, Gm13889, Gpm6b, Acta2, Dag1    |
| <b><i>mdx</i><sup>5cv</sup> diaphragm</b>  | FAP                                                                  | Dcn, Gsn, Col3a1, Col1a2, Col1a1, Mgp, Cilp, Mfap5, Lum, Bgn              |
|                                            | MO/MP                                                                | Lyz2, Apoe, C1qb, Spp1, C1qa, C1qc, Ms4a7, Pf4, Lgals3, Ctss              |
|                                            | DC                                                                   | Cd209, Klrd1, Plbd1, H2-DMA, Lsp1, Cd74, H2-Eb1, H2-Aa, H2-Ab1, Gm2a      |
|                                            | EC                                                                   | Fabp4, Flt1, Cdh5, Egfl7, Kdr, Podxl, Cd36, Cav1, Ly6c1, Gng11            |
|                                            | B                                                                    | Igkc, Cd79a, Ly6d, Iglc2, Ms4a1, Cd79b, Iglc3, Bank1, Ighm, Cd37          |
|                                            | NK                                                                   | Nkg7, Ms4a4b, Ifng, Trbc2, Cd3g, Cd3d, Cd3e, Ccl5, Ctla2a, Aw112010       |
|                                            | MuSC                                                                 | Chodl, Myod1, Igf2, Peg3, Igfbp5, Dag1, Acta2, Hspb1, Egr1, Cdkn1c        |
|                                            | T                                                                    | Trdc, Cxcr6, Cd163l1, Tcrg-C1, Actn2, Il18r1, Il7r, Cd3g, Cd3d, Cd3e      |
|                                            | NKT                                                                  | Gata3, Il1r1, Tnfaip3, Gm20186, Junb, Nfkbia, Tgs2, Fosb, Dnajb1, Ctla2a  |
|                                            | MC                                                                   | Upk3b, Upk1b, Msln, Slpi, Clu, Fmo2, Gm12840, Flrt2, Sfrp2, C3            |
| Neu                                        | S100a9, S100a8, Retnlg, Hdc, Slc7a11, Csf3r, Il1b, Cxcl2, G0s2, Slpi |                                                                           |

**Table S3. Number and percentage of each cell type identified by scRNAseq, related to Figure 1.**

| Sample                              | Cell type         | Number | Percentage  | Total cell number |
|-------------------------------------|-------------------|--------|-------------|-------------------|
| <i>WT</i> quadriceps                | EC                | 1927   | 50.52438385 | 3814              |
|                                     | FAP               | 917    | 24.04299948 |                   |
|                                     | MuSC              | 323    | 8.468799161 |                   |
|                                     | MO/MP             | 269    | 7.052962769 |                   |
|                                     | DC                | 124    | 3.251179864 |                   |
|                                     | Pericytes         | 98     | 2.56948086  |                   |
|                                     | Tenocytes         | 69     | 1.809124279 |                   |
|                                     | B/T/NK            | 48     | 1.258521238 |                   |
|                                     | Schwann           | 39     | 1.022548506 |                   |
| <i>WT</i> diaphragm                 | FAP               | 5956   | 85.23182599 | 6988              |
|                                     | MO/MP             | 263    | 3.763594734 |                   |
|                                     | NKT               | 203    | 2.904979966 |                   |
|                                     | B                 | 193    | 2.761877504 |                   |
|                                     | MC                | 100    | 1.431024614 |                   |
|                                     | MuSC              | 89     | 1.273611906 |                   |
|                                     | T                 | 73     | 1.044647968 |                   |
|                                     | NK                | 57     | 0.81568403  |                   |
|                                     | EC                | 29     | 0.414997138 |                   |
|                                     | Neu               | 25     | 0.357756153 |                   |
| <i>mdx<sup>5cv</sup></i> quadriceps | MO/MP             | 3608   | 57.25166614 | 6302              |
|                                     | FAP               | 1356   | 21.51697874 |                   |
|                                     | EC                | 385    | 6.109171692 |                   |
|                                     | DC                | 355    | 5.633132339 |                   |
|                                     | NK                | 188    | 2.983179943 |                   |
|                                     | MuSC              | 141    | 2.237384957 |                   |
|                                     | Neu               | 97     | 1.539193907 |                   |
|                                     | Tenocytes         | 78     | 1.237702317 |                   |
|                                     | T                 | 65     | 1.031418597 |                   |
|                                     | Schwann/Pericytes | 29     | 0.460171374 |                   |
| <i>mdx<sup>5cv</sup></i> diaphragm  | FAP               | 2704   | 44.40794876 | 6089              |
|                                     | MO/MP             | 1907   | 31.31877156 |                   |
|                                     | DC                | 488    | 8.014452291 |                   |
|                                     | EC                | 253    | 4.155033667 |                   |
|                                     | B                 | 180    | 2.956150435 |                   |
|                                     | NK                | 148    | 2.43061258  |                   |
|                                     | MuSC              | 133    | 2.18426671  |                   |
|                                     | T                 | 97     | 1.593036623 |                   |
|                                     | NKT               | 95     | 1.560190507 |                   |
|                                     | MC                | 52     | 0.853999015 |                   |
|                                     | Neu               | 32     | 0.525537855 |                   |

**Table S4. Top 25 differentially expressed genes of individual FAP clusters in *WT* quadriceps, related to Figure 5.**

| Cluster name | Ly6c1 <sup>hi</sup> Pi16 <sup>hi</sup> | Ly6c1 <sup>hi</sup> Pi16 <sup>lo</sup> | Hsd11b1  | Gdf10    | pro-inflammatory |
|--------------|----------------------------------------|----------------------------------------|----------|----------|------------------|
| Top 25 DEGs  | Krtdap                                 | Fbn1                                   | Cxcl14   | Mgp      | Apod             |
|              | Pi16                                   | Cd55                                   | Hsd11b1  | Prg4     | Gpc3             |
|              | Sbsn                                   | Ccn3                                   | Smoc2    | Cilp     | Fos              |
|              | Smpd3                                  | Stmn4                                  | Crispld2 | Clu      | Angptl7          |
|              | Igfbp5                                 | Uap1                                   | Col4a1   | Gdf10    | Cp               |
|              | Anxa3                                  | Efemp1                                 | Angptl1  | Cst3     | Ccl7             |
|              | Dmkn                                   | Cryab                                  | Mme      | Tmem176b | Cxcl1            |
|              | Aldh1a3                                | Gfpt2                                  | Col15a1  | Fgl2     | Spp1             |
|              | Dpp4                                   | Ugdh                                   | Hmcn2    | Meox2    | Nr4a1            |
|              | Ifi27l2a                               | Axl                                    | Ccl11    | Tnmd     | Btg2             |
|              | Sema3c                                 | Crip1                                  | Lpl      | Bgn      | Ptch1            |
|              | Fn1                                    | Creb5                                  | Gpm6b    | Cfh      | Smim41           |
|              | Procr                                  | Sema3c                                 | Col4a2   | Myoc     | Vit              |
|              | Pla1a                                  | Atox1                                  | G0s2     | Gas1     | Zfp36            |
|              | Efhd1                                  | Anxa8                                  | Hspg2    | Gas6     | Csrp1            |
|              | Edn1                                   | Fstl1                                  | Plau     | Fmo2     | Lum              |
|              | Car8                                   | D630033O11Rik                          | Hspa1a   | Penk     | Matn2            |
|              | Il1r2                                  | Pcsk6                                  | Col5a3   | Kctd12   | Atp1a2           |
|              | Emilin2                                | Pcolce2                                | Fbln7    | Meox1    | Id3              |
|              | Thbd                                   | Actg1                                  | Lamb1    | Cd9      | Col15a1          |
|              | C3                                     | Efhd1                                  | Col6a6   | Emp1     | Ccl2             |
|              | Gan                                    | Mfap5                                  | Apoe     | Ecrp4    | Rasgrp2          |
|              | Akr1c18                                | 1700019D03Rik                          | Enpp2    | S100a4   | Sdc3             |
|              | Sfrp2                                  | Mustn1                                 | Lifr     | Cpe      | Foxs1            |
|              | Plac8                                  | Ppp1r14b                               | Egr1     | Tmem176a | Thbs1            |

**Table S5. Top 25 differentially expressed genes of individual FAP clusters in *WT* diaphragm, related to Figure 5.**

| Cluster name | Ly6c1 <sup>hi</sup> Pi16 <sup>hi</sup> | Ly6c1 <sup>hi</sup> Pi16 <sup>low</sup> | Hsd11b1  | Gdf10     | pro-inflammatory | Sfrp2   | Postn   |
|--------------|----------------------------------------|-----------------------------------------|----------|-----------|------------------|---------|---------|
| Top 25 DEGs  | Igfbp5                                 | Ly6c1                                   | Cxcl14   | Tmem176b  | Mt1              | Sfrp2   | Postn   |
|              | Krtdap                                 | Ly6a                                    | Hsd11b1  | Cst3      | Socs3            | Thbs4   | Ccl7    |
|              | Ugdh                                   | Cd55                                    | Ccl11    | Gdf10     | Has1             | Tnmd    | Ccn2    |
|              | Sbsn                                   | Cd248                                   | G0s2     | Col6a5    | Zfp36            | Mfap4   | Col8a1  |
|              | Sult1e1                                | Stmn4                                   | Vtn      | Sfrp1     | Mt2              | Angptl1 | Timp1   |
|              | Gm12840                                | Fn1                                     | AW112010 | Srpx      | Thbs1            | Thbs2   | Thbs4   |
|              | Gfpt2                                  | Pla1a                                   | Gpm6b    | Penk      | Gadd45g          | Pdgfrl  | Cilp    |
|              | Tnfaip6                                | Uap1                                    | Ces1d    | Steap4    | Hk2              | Eln     | Prg4    |
|              | Sema3c                                 | Pcolce2                                 | Spry1    | Apod      | Cebpd            | Igfbp3  | Dio2    |
|              | Ptgs1                                  | Fbn1                                    | Dnajb1   | Ndufa3    | Atf3             | Gas1    | Aspn    |
|              | Efemp1                                 | Pcsk6                                   | Prss23   | Fmo2      | Tnfaip6          | Nbl1    | Fibin   |
|              | Fn1                                    | Tmem100                                 | Itih5    | C3        | Id3              | Sfrp4   | Ltbp2   |
|              | Anxa3                                  | Crip1                                   | Crispld2 | Gpx3      | Bhlhe40          | Ntrk2   | C1qtnf3 |
|              | Dpp4                                   | Mustn1                                  | Apod     | Mgp       | Sat1             | Fxyd6   | F2r     |
|              | Smpd3                                  | Efemp1                                  | Plau     | Nrp1      | Myc              | Col12a1 | Mfap4   |
|              | Pi16                                   | Ifi2712a                                | Hspg2    | Fst       | Junb             | Lox     | Cfh     |
|              | Efhd1                                  | Myoc                                    | Col6a3   | Cxcl12    | Ccn1             | Col1a1  | Pmepa1  |
|              | Thbd                                   | Ppp1r14b                                | Hspa1a   | Sec61g    | Cxcl1            | Itgbl1  | Sfrp4   |
|              | Cd248                                  | Ecm1                                    | Lifr     | Spcs1     | Egr1             | Tcf712  | Ccdc3   |
|              | Has1                                   | Ackr3                                   | Smoc2    | Serpina3n | Btg2             | Col14a1 | Bgn     |
|              | Uap1                                   | Actg1                                   | Kcnk2    | Inmt      | Cebpb            | Col8a1  | Pam     |
|              | Pla1a                                  | Axl                                     | Adm      | F3        | Fos              | Cpe     | Meox1   |
|              | Emilin2                                | Anxa2                                   | Rgmb     | Cp        | Nr4a1            | Col3a1  | Cd9     |
|              | Mt2                                    | Efhd1                                   | Vwa1     | Fth1      | Ier3             | Slit2   | Lgals1  |
|              | Ifi2712a                               | Creb5                                   | Col4a1   | Nop10     | Ptgs2            | Svil    | Col12a1 |

**Table S6. Top 25 differentially expressed genes of individual FAP clusters in *mdx*<sup>5cv</sup> quadriceps, related to Figure 5.**

| Cluster name | Ly6c1 <sup>hi</sup> Pi16 <sup>hi</sup> | Hsd11b1  | Gdf10    | pro-inflammatory | Acta2  | Postn   | Gm42418       |
|--------------|----------------------------------------|----------|----------|------------------|--------|---------|---------------|
| Top 25 DEGs  | Pi16                                   | Eln      | Clu      | Mt1              | Hmgb2  | Postn   | Gm42418       |
|              | Sema3c                                 | Hmcn2    | Comp     | Mt2              | Stmn1  | Tnc     | Cd74          |
|              | Igfbp5                                 | Htra3    | Myoc     | Ccl7             | H2afz  | Cthrc1  | Tm6sf1        |
|              | Anxa3                                  | Col6a6   | Apod     | Ccl2             | S100a4 | Csrp2   | Il1rl1        |
|              | Smpd3                                  | Abca8a   | Prg4     | Ptx3             | Top2a  | Col8a1  | Laptm5        |
|              | Pcolce2                                | Col15a1  | Cfh      | Timp1            | Cenpa  | Mest    | Rbms3         |
|              | Ackr3                                  | Mmp2     | Cyp2f2   | Fgl2             | Cks2   | Sfrp2   | Rplp2         |
|              | Pla1a                                  | Angptl1  | Meox2    | Ifi205           | Birc5  | C1qtnf3 | Chchd2        |
|              | C4b                                    | Lpl      | Boc      | Thbs1            | Pclaf  | Col1a1  | Med13         |
|              | Efemp1                                 | Itih5    | Penk     | Cxcl5            | Ube2c  | Aspn    | Stau1         |
|              | Plpp3                                  | Lum      | Gdf10    | Cxcl1            | Cenpf  | Ltbp2   | Snhg8         |
|              | Dpp4                                   | Smoc2    | Serpine2 | Serpine1         | Ccnb2  | Col12a1 | Psmd1         |
|              | Efhd1                                  | Tnxb     | Cpxm2    | Errfi1           | Ccna2  | Bgn     | Pcm1          |
|              | Thbd                                   | Fbln7    | Cst3     | ligp1            | Mki67  | Col16a1 | Cdc37         |
|              | C3                                     | Col4a1   | Ntrk2    | Sdc4             | Cdk1   | Ptn     | Cnot1         |
|              | Procr                                  | Abca8b   | Scara3   | Ifi203           | Cdca3  | Ccn4    | Pgls          |
|              | Cd248                                  | Crispld2 | Cdh11    | Mcoln2           | Acta2  | H19     | Arpc4         |
|              | Ly6c1                                  | Rora     | Kctd12   | Fst              | Sfrp2  | Lgals1  | Nifk          |
|              | Cxcl13                                 | Hsd11b1  | Nbl1     | Hk2              | Cdc20  | Acta2   | Pdha1         |
|              | Pcsk6                                  | Dpep1    | Crispld1 | Il33             | Ltbp2  | Fn1     | Dnajb6        |
|              | Tmem100                                | Clec3b   | Colec12  | Pdpn             | Anln   | Adam12  | Rap2b         |
|              | Adgrd1                                 | Nid2     | Pik3r1   | Noct             | Hmmr   | Thbs4   | Dync1i2       |
|              | Fn1                                    | Dcn      | Etv1     | Prg4             | Pcna   | Dclk1   | Cct5          |
|              | Emilin2                                | Tgfb1    | Meox1    | Cd44             | Hmgb1  | Palld   | 9530068E07Rik |
|              | Gfpt2                                  | Ifi30    | Tmem176a | Cxcl14           | Fabp5  | Tagln   | Myl6          |

**Table S7. Top 25 differentially expressed genes of individual FAP clusters in *mdx*<sup>5cv</sup> diaphragm, related to Figure 5.**

| Cluster name | Ly6c1 <sup>hi</sup> Pi16 <sup>hi</sup> | pro-inflammatory | Sfrp2   | Postn   | Stressed | IFN activated |
|--------------|----------------------------------------|------------------|---------|---------|----------|---------------|
| Top 25 DEGs  | Ly6c1                                  | Ccl2             | Sfrp2   | Postn   | Apod     | Ifit3         |
|              | Cd248                                  | Ccl7             | Eln     | H19     | C3       | Isg15         |
|              | Pi16                                   | Timp1            | Mfap4   | Cthrc1  | Inmt     | Ifit1         |
|              | Tmem100                                | Thbs1            | Gas1    | C1qtnf3 | Col6a5   | Igfp1         |
|              | Sema3c                                 | Inhba            | Cfh     | Col1a1  | Junb     | Ifit3b        |
|              | Fn1                                    | Tm4sf1           | Sfrp1   | Meg3    | Egr1     | Cxcl9         |
|              | Pcolce2                                | Tnc              | Cst3    | Thbs4   | Hspa1a   | Rsad2         |
|              | Igfbp5                                 | Aldh1a3          | Itgb1   | Rian    | Fos      | Oasl2         |
|              | Klf2                                   | Serpine1         | Pdgfrr1 | Col3a1  | Hspa1b   | Igtp          |
|              | Ugdh                                   | Pdprn            | Pcsk5   | Col6a3  | Gpx3     | Bst2          |
|              | Klf4                                   | Mt2              | Cpxm2   | Nrep    | Cebpd    | Gbp2          |
|              | Ackr3                                  | Prg4             | Cilp    | Mest    | Dpep1    | Gm4951        |
|              | Adgrd1                                 | Ran              | Angptl1 | Col8a1  | Gsn      | Ifi203        |
|              | Cd55                                   | Nme1             | Ccdc80  | Dlk1    | Crispld2 | Rnf213        |
|              | Scara5                                 | Npm1             | Prepl   | Col5a2  | Penk     | AW112010      |
|              | Efemp1                                 | Slc25a5          | Fibin   | Aspn    | Gstm1    | Gbp7          |
|              | Gfpt2                                  | Ncl              | Mgp     | Col1a2  | Jun      | Ly6e          |
|              | Emilin2                                | Cxcl14           | Ogn     | Plagl1  | Htra3    | Phf11d        |
|              | Uap1                                   | Eif5a            | Tgfb3   | Fn1     | Txnip    | Sp100         |
|              | Tppp3                                  | Angptl4          | Ccn2    | Col5a1  | Btg2     | Ifi47         |
|              | C3                                     | Mif              | Mmp2    | Ppic    | Ggt5     | Gbp3          |
|              | Hspb1                                  | Itga5            | Selenop | Vcan    | Abca8a   | Rtp4          |
|              | Igfbp6                                 | Mt1              | Gas6    | Cdkn1c  | Klf9     | Stat1         |
|              | Plpp3                                  | Hspd1            | Fbln7   | Ltbp2   | Lpl      | Mndal         |
|              | Pla1a                                  | Actg1            | Myoc    | Bgn     | Steap4   | Trim30a       |
